# Supplementary material for: Atherosclerotic Pre-Conditioning Affects the Paracrine Role of Circulating Angiogenic Cells Ex-Vivo
Source: PubMed Central journal article supplement (PMC7432497; doi:10.3390/ijms21155256), 2020-07-24
Supplement: ijms-21-05256-s001.pdf [file ijms-21-05256-s001.pdf]

## Supplementary Materials and Methods

### “Atherosclerotic pre-conditioning affects the paracrine role of circulating angiogenic cells *ex-vivo*”

#### Characterization of ECFC

ECFC phenotype was characterized by testing cloning-forming ability, migration towards FGF-2, angiogenesis assays and indirect immunofluorescence.

##### 1. Clonal ability

ECFC were cultured for 10 days at clonal density (10 cell/cm<sup>2</sup>) onto 1% gelatin-coated plates using endothelial cell-medium. Medium was refreshed on day 5. At day 10, colonies containing 12 or more cells (i.e., at least 3 divisions) were scored under a fluorescence microscope after Hoechst (1:1000; Life technologies, video time lapse, Leica) staining of the nuclei. Endothelial phenotype was confirmed through the binding of FITC labeled Ulex Europaeus Agglutinin I (UEA-1; 2:100; Vector Laboratories, Burlingame) using a fluorescence microscope. Colonies were categorized into large (>300 cells), medium (101- 300 cells) and small (12-100 cells) sizes. The number of cells in each colony was quantified under a fluorescence microscope after Hoechst staining using ImageJ analysis software.

##### 2. Scratch assay

Confluent cultures of ECFC were pre-incubated in EBM-2, 5 % FBS (basal medium) for 6 h. Scratch wounds were generated across using a pipette tip. Cells were then treated for 24 h using basal medium in the presence or absence of 1 ng/mL FGF-2. Scratch size was measured after 24 h for each culture condition with phase contrast microscope

##### 3. Indirect immunofluorescence

Immunofluorescence was carried out using mouse anti-human CD31 (1:100; BD Biosciences, REF: 130-092-653) and mouse anti-human von Willebrand factor (vWF) (1:200; Genetex), followed by Alexa Flour 488 donkey anti-mouse conjugated secondary antibody (1:1000; Life technologies, REF:A-21202) and cell nuclei were counterstained with Hoechst. Also, endothelial phenotype was confirmed through the

binding of FITC labeled Ulex Europaeus Agglutinin I (UEA-1; 2:100; Vector Laboratories, Burlingame) using a fluorescence microscope.

#### **4. Angiogenesis assays**

The formation of vascular networks in vitro was evaluated using Matrigel. ECFC were seeded on Matrigel-coated plates at a density of  $2 \times 10^4$  cell/cm<sup>2</sup> and incubated for 24h in endothelial cell-medium. The lengths of ECFC-lined cords were visualized under a fluorescence microscope.

## Supplementary figure S1

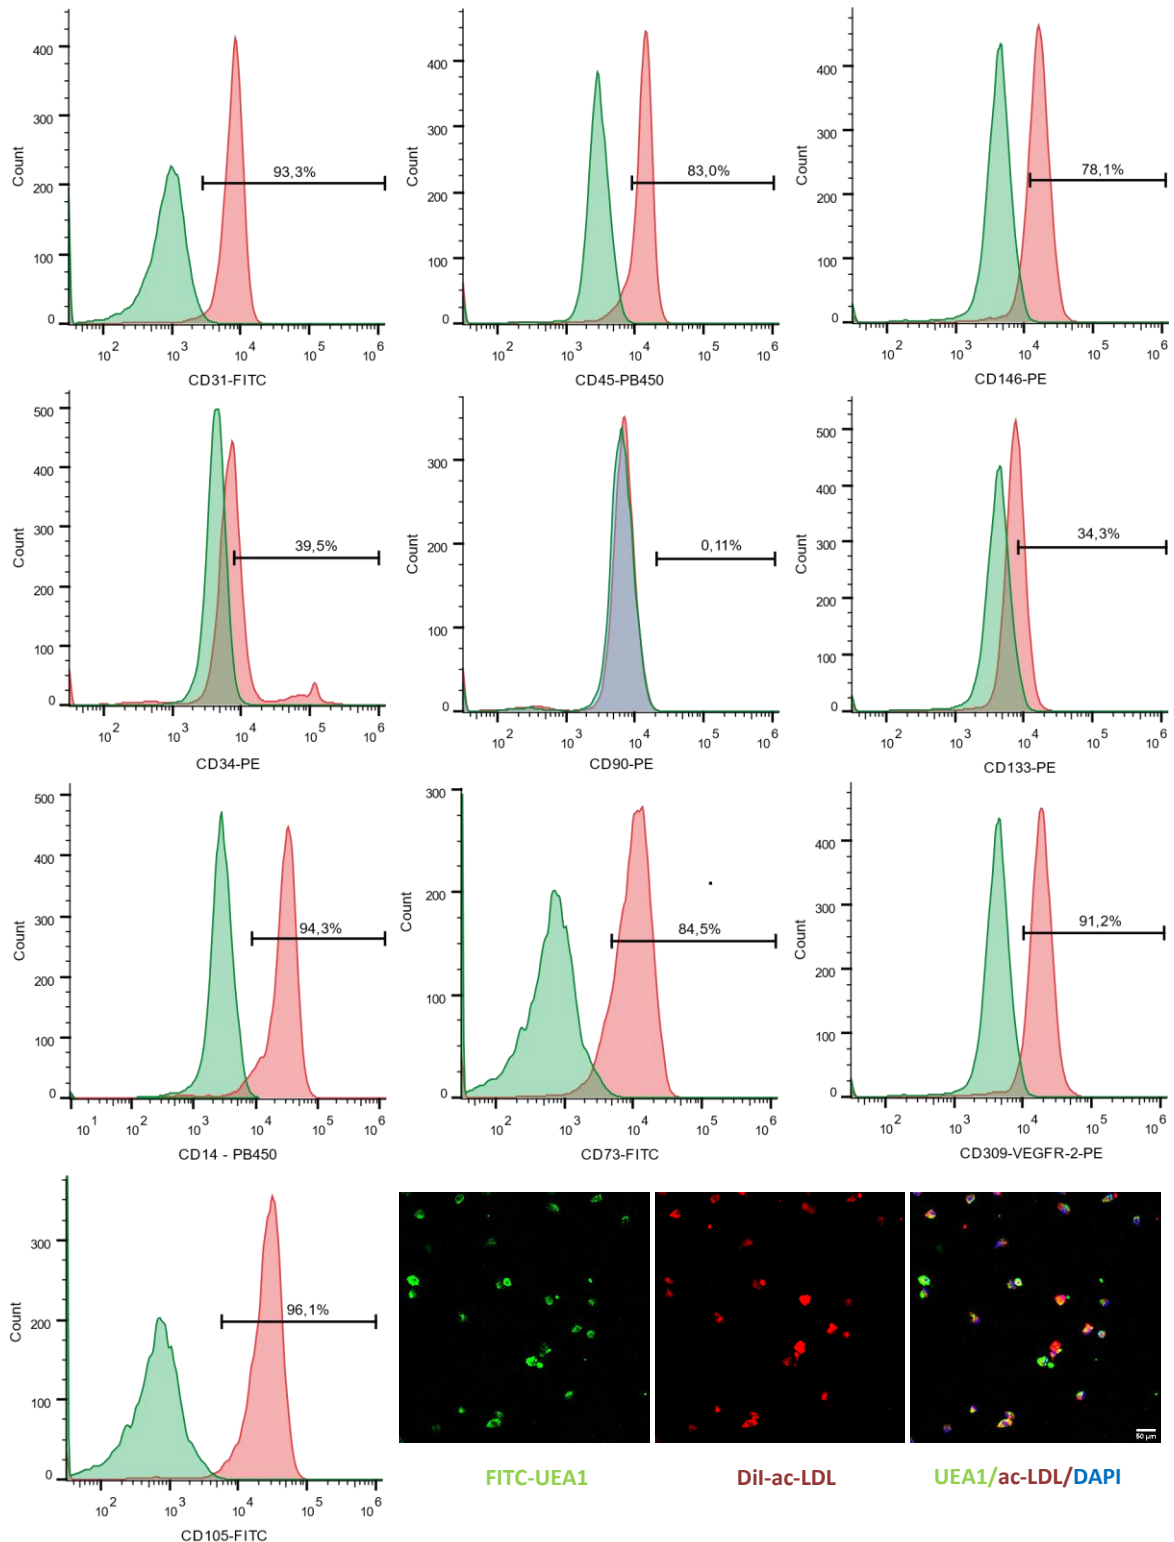

**Supplementary Figure S1: Characterization of cultured CAC.** Cells were isolated from PBMC of healthy donors and cultured in fibronectin-coated plates. On day 7, cell identity was confirmed by flow cytometry, analyzing the following markers: CD31, CD34, CD45, CD90, CD73, CD105, CD309 (VEGFR2), CD133, CD146 and CD14. Specific isotype antibodies were used as negative controls. Data were presented as percentage of positive cells (%), for both, the isotype control (blue) and positive markers analyzed (red). Additionally, CAC identity was also confirmed by immunohistochemistry, with cells presenting double labeling with UEA1 and Ac-LDL uptake.

**Supplementary Figure S2: Characterization of ECFC. (A) Cloning-forming ability of ECFC was examined at clonal density (passage 1).** The endothelial nature of the colonies was confirmed by binding of UEA-1 lectin (green) and cell nuclei were counterstained with Hoechst (blue). Percentage of cells with cloning ability (20 cells after 10 days). Colonies were categorized into large (>501 cells), medium (201–500 cells) and small (20–200 cells) size. All bars represent mean  $\pm$  SD from three independent samples. **(B) Phenotypical characterization of ECFC.** Phase contrast micrographs from confluent monolayer of ECFCs with characteristic cobble-stone morphology. Indirect immunofluorescence of ECFCs showed positive staining for CD31, and vWF (both in green). Cell nuclei were counterstained with Hoechst (blue). Representative phase contrast micrographs of capillary-like tube formation by ECFCs on 2D-Matrigel. **(C) Representative phase contrast micrographs depicting the closure of a gap created in an ECFC monolayer.** Gap closure was monitored in response to FGF-2 (1 ng/mL) (E). Migratory capacity of ECFC in response to FGF-2 expressed as percentage of gap closure after 6 hours. Bars represent mean  $\pm$  SE (n=3). We use the basal medium as a control.

## Supplementary Figure S2

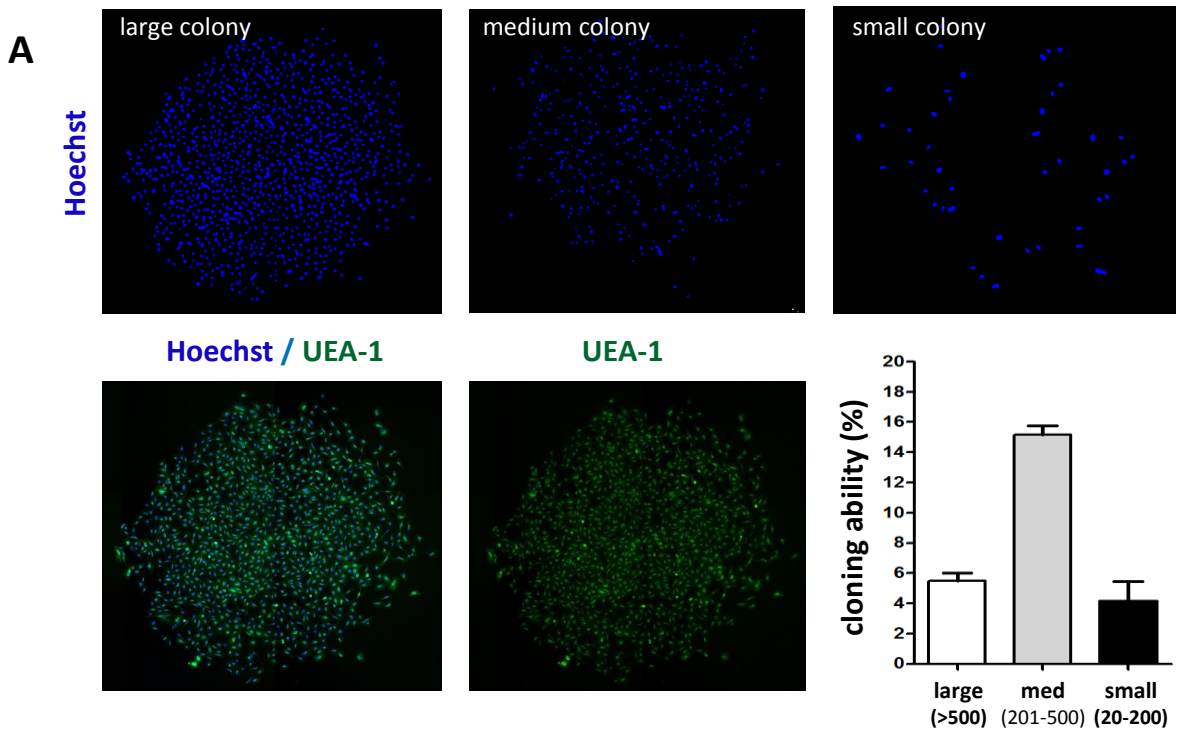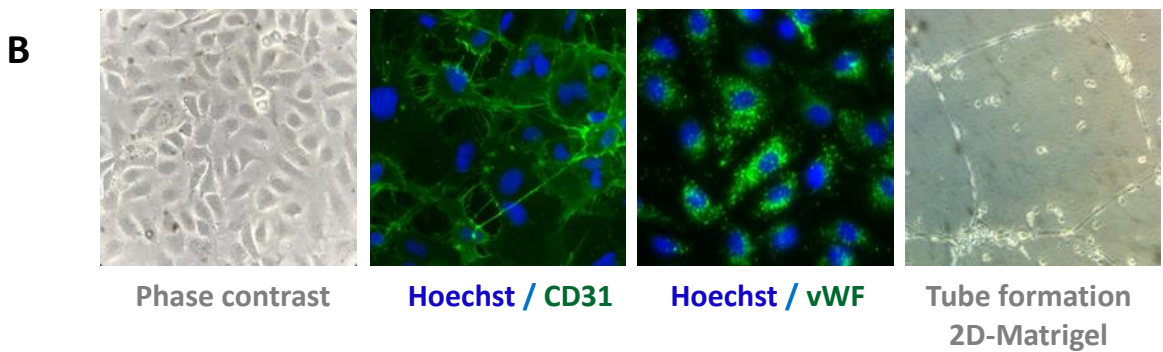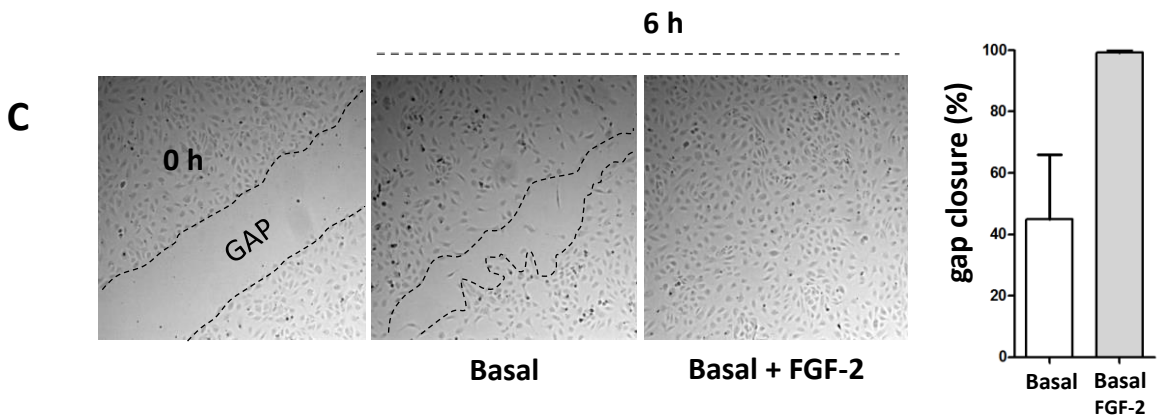

**Supplementary Table S1. Quantitative comparison of secretome expression of healthy CAC (CAC control) and CAC treated with supernatants of atherosclerotic plaques (CAC+AP).** Samples were run in triplicates. The table includes (from left to right): Uniprot accession number; protein description with gene name (GN);

**Involved in (DAVID): MD:** Macular degeneration; **AT:** Atherosclerosis; **HT:** Hypertension; **MI:** Myocardial Infarction; **CD:** Coronary disease; **DII:** Type II Diabetes; **CAD:** Coronary artery disease; **NV-MD:** Neovascularization and macular degeneration; **CNV:** Choroidal neovascularization; **CVD:** Cardiovascular disease; **AAA:** Abdominal aortic aneurysm; **HD-IS:** Heart disease ischemia; **VTB:** Venous thromboembolism; **MIS:** myocardial ischemia; **BH:** Brain hemorrhage; **TB:** Thrombosis; **DII-ED:** Type II diabetes and edema;

**Involved in (String): RA:** Regulation of angiogenesis; **RECM:** Regulation of endothelial cell migration; **A:** Angiogenesis; **RECP:** Regulation of endothelial cell proliferation; **RECC:** Regulation of endothelial cell chemotaxis; **PRA:** Positive regulation of angiogenesis; **AD:** Artery development; **RBVECM:** Regulation of blood vessel endothelial cell migration; **RVEGFRSP:** regulation of vascular endothelial growth factor receptor signaling pathway; **NRA:** Negative regulation of angiogenesis; **NRECM:** Negative regulation of endothelial cell migration; **PRECAP:** Positive regulation of endothelial cell apoptotic process; **NRECP:** Negative regulation of endothelial cell proliferation; **NRBVECM:** Negative regulation of blood vessel endothelial cell migration; **PRECM:** Positive regulation of endothelial cell migration; **PRECC:** Positive regulation of endothelial cell chemotaxis

**Involved in (IPA): DV:** Development of vasculature; **V:** Vasculogenesis; **A:** Angiogenesis; **N:** Necrosis; **AP:** Apoptosis; **AT:** Atherosclerosis lesion; **PVD:** Peripheral vascular disease.

**Changes detected:** protein up- or down-regulation (considering pvalue<0.05 and fold>1.5 in at least 2 out of 3 samples);

AP\_C:-Log Student's T-test p-value AP\_Ctr; AP\_C:log2(AP\_C); AP\_C:Student's T-test Difference AP\_Ctr

| Accession | Description                                                                                           | Involved in (DAVID)                           | Involved in (String) | Involved in (IPA)    | changes detected | AP_C: -Log Student's T-test p-value AP_Ctr | AP_C: log2(AP/C) | AP_C: Student's T-test Difference AP_Ctr |
|-----------|-------------------------------------------------------------------------------------------------------|-----------------------------------------------|----------------------|----------------------|------------------|--------------------------------------------|------------------|------------------------------------------|
| P35749    | Myosin-11 [MYH11]                                                                                     |                                               |                      | DV, N, AP            | Up-reg           | 3,94071                                    | 7,71909          | 7,13285                                  |
| P35580    | Myosin-10 [MYH10]                                                                                     |                                               | AD                   | DV, V, A, N, AP      | Up-reg           | 3,1082                                     | 7,32816          | 6,65962                                  |
| P13611    | Versican core protein [VCAN]                                                                          | AAA, BH                                       |                      | N, AP, AT            | Up-reg           | 4,79669                                    | 7,02194          | 7,75568                                  |
| P09493    | Tropomyosin alpha-1 chain [TPM1]                                                                      | CVD                                           |                      | N, AP                | Up-reg           | 6,3478                                     | 6,61039          | 6,60877                                  |
| P98095    | Fibulin-2 [FBLN2]                                                                                     |                                               |                      | DV, A                | Up-reg           | 7,55087                                    | 6,57313          | 6,50101                                  |
| P23527    | Histone H2B type 1-O [HIST1H2BO]                                                                      |                                               |                      | N                    | Up-reg           | 1,54762                                    | 6,51005          | 4,38873                                  |
| Q05682    | Caldesmon [CALD1]                                                                                     |                                               |                      |                      | Up-reg           | 6,33948                                    | 6,45531          | 6,61368                                  |
| P98160    | Basement membrane-specific heparan sulfate proteoglycan core protein;Endorepellin;LG3 peptide [HSPG2] | AAA                                           | RA, A, NRA           | DV, V, A, AP, AT     | Up-reg           | 3,86108                                    | 6,26962          | 7,07437                                  |
| Q15063    | Periostin [POSTN]                                                                                     |                                               |                      | N                    | Up-reg           | 3,41778                                    | 6,193            | 6,43687                                  |
| P00734    | Prothrombin [F2]                                                                                      | AT, HT, MI, CD, DII, CAD, NV-MD, VTB, MIS, TB |                      | DV, V, A, N, AP, PVD | Up-reg           | 4,59251                                    | 5,56742          | 5,62746                                  |
| Q16270    | Insulin-like growth factor-binding protein 7                                                          |                                               |                      | DV, V, A, N, AP      | Up-reg           | 4,94055                                    | 5,39443          | 5,30686                                  |

| [IGFBP7]      |                                                                     |                           |           |                      |        |         |         |         |
|---------------|---------------------------------------------------------------------|---------------------------|-----------|----------------------|--------|---------|---------|---------|
| <b>P08294</b> | Extracellular superoxide dismutase [Cu-Zn] [SOD3]                   | AT, HT, DII               |           | N, AP                | Up-reg | 5,67541 | 5,33588 | 5,44871 |
| <b>P05452</b> | Tetranectin [CLEC3B]                                                |                           |           |                      | Up-reg | 3,20395 | 5,32514 | 4,55342 |
| <b>P08519</b> | Apolipoprotein(a) [LPA]                                             | AT, MI, CD, DII, CAD, VTB |           | AT                   | Up-reg | 3,51525 | 5,27458 | 5,77116 |
| <b>P02763</b> | Alpha-1-acid glycoprotein 1 [ORM1]                                  | TB                        |           | DV, V, A             | Up-reg | 2,43281 | 5,03809 | 4,35803 |
| <b>P39060</b> | Collagen alpha-1(XVIII) chain; Endostatin [COL18A1]                 |                           | A, PRECAP | DV, V, A, N, AP, AT  | Up-reg | 5,83644 | 5,02971 | 5,20378 |
| <b>Q12805</b> | EGF-containing fibulin-like extracellular matrix protein 1 [EFEMP1] | MD, AT, NV-MD             |           | N, AP                | Up-reg | 3,10514 | 4,84334 | 6,09534 |
| <b>P01591</b> | Immunoglobulin J chain [IGJ]                                        |                           |           |                      | Up-reg | 3,0193  | 4,81263 | 4,38235 |
| <b>P51888</b> | Prolargin [PRELP]                                                   | HT                        |           |                      | Up-reg | 2,31832 | 4,75712 | 3,85749 |
| <b>P21980</b> | Protein-glutamine gamma-glutamyltransferase 2 [TGM2]                |                           |           | DV, V, A, N, AP      | Up-reg | 5,77687 | 4,60311 | 4,56404 |
| <b>Q8N251</b> | Latent-transforming growth factor beta-binding protein 4 [LTBP4]    | AAA                       |           |                      | Up-reg | 2,99213 | 4,40798 | 4,09782 |
| <b>P02766</b> | Transthyretin [TTR]                                                 | CVD                       |           | N, AP                | Up-reg | 5,37588 | 4,36747 | 4,31563 |
| <b>Q9UBX5</b> | Fibulin-5 [FBLN5]                                                   | MD, AT                    |           | DV, V, A             | Up-reg | 6,08199 | 4,36478 | 4,2932  |
| <b>P35555</b> | Fibrillin-1 [FBN1]                                                  | CVD                       |           | DV, AP               | Up-reg | 2,8177  | 4,29115 | 4,1073  |
| <b>Q01995</b> | Transgelin [TAGLN]                                                  |                           |           |                      | Up-reg | 1,77199 | 4,28785 | 3,68712 |
| <b>P21810</b> | Biglycan [BGN]                                                      |                           |           | N, AP                | Up-reg | 3,33286 | 4,16016 | 4,35765 |
| <b>P55290</b> | Cadherin-13 [CDH13]                                                 | HT, MI, CD, CAD           | A, RECP   | DV, V, A             | Up-reg | 4,55579 | 4,12511 | 4,3219  |
| <b>Q14767</b> | Latent-transforming growth factor beta-binding protein 2 [LTBP2]    | HT                        |           |                      | Up-reg | 4,02251 | 4,02096 | 4,66344 |
| <b>Q8N1B4</b> | Vacuolar protein sorting-associated protein 52 homolog [VPS52]      |                           |           |                      | Up-reg | 2,47272 | 3,99467 | 3,71678 |
| <b>Q99715</b> | Collagen alpha-1(XII) chain [COL12A1]                               |                           |           |                      | Up-reg | 1,9382  | 3,98783 | 3,42282 |
| <b>P19823</b> | Inter-alpha-trypsin inhibitor heavy chain H2 [ITIH2]                |                           |           |                      | Up-reg | 3,39344 | 3,92032 | 4,42653 |
| <b>P35442</b> | Thrombospondin-2 [THBS2]                                            | AT, MI, DII, HD-IS        | RA, NRA   | DV, V, A, N, AP, PVD | Up-reg | 3,92497 | 3,79769 | 4,14596 |
| <b>P20774</b> | Mimecan [OGN]                                                       |                           |           |                      | Up-reg | 2,94287 | 3,74539 | 3,98849 |
| <b>P80362</b> | Ig kappa chain V-I region WAT                                       |                           |           |                      | Up-reg | 5,50711 | 3,73266 | 3,7335  |
| <b>P12111</b> | Collagen alpha-3(VI) chain [COL6A3]                                 | HT                        |           |                      | Up-reg | 1,63946 | 3,71811 | 3,37314 |

|               |                                                                  |                    |                                   |                      |        |         |         |         |
|---------------|------------------------------------------------------------------|--------------------|-----------------------------------|----------------------|--------|---------|---------|---------|
| <b>Q8IUX7</b> | Adipocyte enhancer-binding protein 1 [AEBP1]                     |                    |                                   |                      | Up-reg | 2,54019 | 3,66254 | 4,1153  |
| <b>P07360</b> | Complement component C8 gamma chain [C8G]                        |                    |                                   |                      | Up-reg | 5,51186 | 3,58036 | 3,62757 |
| <b>Q9NR12</b> | PDZ and LIM domain protein 7 [PDLIM7]                            |                    |                                   | N, AP                | Up-reg | 5,02013 | 3,57052 | 3,56527 |
| <b>P23142</b> | Fibulin-1 [FBLN1]                                                |                    |                                   | DV, V, A, N, AP      | Up-reg | 2,83917 | 3,52907 | 4,32393 |
| <b>P01877</b> | Ig alpha-2 chain C region [IGHA2]                                |                    |                                   |                      | Up-reg | 3,1107  | 3,50488 | 3,33492 |
| <b>Q92743</b> | Serine protease HTRA1 [HTRA1]                                    | MD, AT, NV-MD, CNV |                                   | DV, V, A, N, AP, PVD | Up-reg | 2,25455 | 3,35251 | 2,95276 |
| <b>P07357</b> | Complement component C8 alpha chain [C8A]                        | MD                 |                                   |                      | Up-reg | 2,75251 | 3,33309 | 3,34951 |
| <b>P19827</b> | Inter-alpha-trypsin inhibitor heavy chain H1 [ITI1H1]            |                    |                                   |                      | Up-reg | 2,74122 | 3,2537  | 4,12734 |
| <b>P36955</b> | Pigment epithelium-derived factor [SERPINF1]                     | MD, NV-MD          | RA, RECM, NRA, NRECM              | DV, V, A, N, AP      | Up-reg | 3,02739 | 3,25342 | 3,76382 |
| <b>Q05707</b> | Collagen alpha-1(XIV) chain [COL14A1]                            | CAD                |                                   |                      | Up-reg | 2,15843 | 3,2461  | 4,05636 |
| <b>P01871</b> | Ig mu chain C region [IGHM]                                      |                    |                                   | DV, N, AP            | Up-reg | 1,94498 | 3,18014 | 3,92311 |
| <b>P02749</b> | Beta-2-glycoprotein 1 [APOH]                                     | BH                 | RA, RECM, RECP, NRA, NRECM, NRECP | DV, V, A, PVD        | Up-reg | 2,35346 | 3,13551 | 3,86918 |
| <b>P01623</b> | Ig kappa chain V-III region WOL                                  |                    |                                   |                      | Up-reg | 2,38652 | 3,0875  | 3,8975  |
| <b>P04217</b> | Alpha-1B-glycoprotein [A1BG]                                     |                    |                                   |                      | Up-reg | 3,15997 | 3,06388 | 3,7646  |
| <b>P02748</b> | Complement component C9 [C9]                                     | MD                 |                                   | N                    | Up-reg | 1,71671 | 3,01256 | 2,50894 |
| <b>Q14766</b> | Latent-transforming growth factor beta-binding protein 1 [LTBP1] | AAA                | AD                                | DV, V, A, N, AP      | Up-reg | 3,22071 | 2,91756 | 3,64212 |
| <b>P13671</b> | Complement component C6 [C6]                                     | MD                 | RA, PRA                           | DV, V, A, AP         | Up-reg | 2,447   | 2,85754 | 2,70732 |
| <b>P01834</b> | Ig kappa chain C region [IGKC]                                   |                    |                                   |                      | Up-reg | 2,76872 | 2,84518 | 2,97599 |
| <b>Q9GZM7</b> | Tubulointerstitial nephritis antigen-like [TINAGL1]              |                    |                                   | PVD                  | Up-reg | 3,74772 | 2,74449 | 2,85028 |
| <b>P39059</b> | Collagen alpha-1(XV) chain;Restin [COL15A1]                      |                    | A                                 | DV, V, A             | Up-reg | 2,52227 | 2,72633 | 2,54905 |
| <b>P04004</b> | Vitronectin [VTN]                                                | MD                 | RVEGFRSP                          | DV, V, A, N, AP      | Up-reg | 2,3212  | 2,71561 | 3,50268 |
| <b>P22105</b> | Tenascin-X [TNXB]                                                |                    |                                   |                      | Up-reg | 2,24045 | 2,71004 | 3,36791 |
| <b>P01861</b> | Ig gamma-4 chain C region [IGHG4]                                |                    |                                   |                      | Up-reg | 3,03993 | 2,66387 | 3,29399 |
| <b>P02760</b> | Protein AMBP;Alpha-1-microglobulin;Trypstatin [AMBP]             |                    |                                   |                      | Up-reg | 2,66783 | 2,63625 | 4,11806 |



|        |                                                            |                                            |                                                                          |                          |        |         |         |         |
|--------|------------------------------------------------------------|--------------------------------------------|--------------------------------------------------------------------------|--------------------------|--------|---------|---------|---------|
| P13987 | CD59 glycoprotein [CD59]                                   | MD                                         |                                                                          | N, AP, AT                | Up-reg | 2,11873 | 2,57727 | 2,62439 |
| P01859 | Ig gamma-2 chain C region [IGHG2]                          |                                            |                                                                          |                          | Up-reg | 1,83008 | 2,56303 | 4,11973 |
| Q9Y6C2 | EMILIN-1 [EMILIN1]                                         | HT                                         | RA, RVEGFRSP, NRA                                                        | DV, A                    | Up-reg | 2,24245 | 2,52992 | 2,27858 |
| P24821 | Tenascin [TNC]                                             |                                            |                                                                          | DV, V, A, N, AP          | Up-reg | 2,03385 | 2,5264  | 4,2342  |
| P51884 | Lumican [LUM]                                              |                                            |                                                                          | DV, N, AP                | Up-reg | 2,02112 | 2,52553 | 3,94152 |
| P01598 | Ig kappa chain V-I region EU                               |                                            |                                                                          |                          | Up-reg | 5,60493 | 2,50262 | 2,46254 |
| Q15113 | Procollagen C-endopeptidase enhancer 1 [PCOLCE]            |                                            |                                                                          |                          | Up-reg | 2,05456 | 2,47702 | 3,2582  |
| P01857 | Ig gamma-1 chain C region [IGHG1]                          |                                            |                                                                          | DV, V, A, N, AP, AT      | Up-reg | 1,5969  | 2,47487 | 3,77513 |
| P01042 | Kininogen-1 [KNG1]                                         | HT                                         |                                                                          | DV, V, A, N, AP          | Up-reg | 1,97988 | 2,45579 | 2,59569 |
| P22352 | Glutathione peroxidase 3 [GPX3]                            | AT                                         |                                                                          | PVD                      | Up-reg | 2,14034 | 2,36639 | 2,18995 |
| O43866 | CD5 antigen-like [CD5L]                                    |                                            |                                                                          | N, AP                    | Up-reg | 1,42872 | 2,33294 | 2,69936 |
| P04003 | C4b-binding protein alpha chain [C4BPA]                    | MD                                         |                                                                          |                          | Up-reg | 1,88068 | 2,28399 | 3,30807 |
| P18206 | Vinculin [VCL]                                             |                                            |                                                                          | AP                       | Up-reg | 2,08589 | 2,28272 | 1,98378 |
| P10643 | Complement component C7 [C7]                               | MD                                         |                                                                          | N                        | Up-reg | 2,60943 | 2,25598 | 2,21443 |
| P10909 | Clusterin;Clusterin beta chain;Clusterin alpha chain [CLU] | MD                                         |                                                                          | DV, N, AP, PVD           | Up-reg | 1,66889 | 2,21434 | 4,31718 |
| P01024 | Complement C3 [C3]                                         | MD, AT, CD, CNV, VTB                       | RA, PRA                                                                  | DV, V, A, N, AP          | Up-reg | 1,56159 | 2,20624 | 4,31121 |
| P0CG05 | Ig lambda-2 chain C regions [IGLC2]                        |                                            |                                                                          |                          | Up-reg | 2,0969  | 2,20031 | 3,22741 |
| P27918 | Properdin [CFP]                                            |                                            |                                                                          |                          | Up-reg | 2,64245 | 2,09854 | 2,72293 |
| P07996 | Thrombospondin-1 [THBS1]                                   | AT, MI                                     | RA, RECM, A, RECP, RECC, PRA, RBVECM, NRA, NRECM, PRECAP, NRECP, NRBVECM | DV, V, A, N, AP, AT, PVD | Up-reg | 5,14234 | 2,03757 | 2,08905 |
| P12109 | Collagen alpha-1(VI) chain [COL6A1]                        |                                            |                                                                          | N, PVD                   | Up-reg | 1,79444 | 1,96944 | 1,74301 |
| P08603 | Complement factor H [CFH]                                  | MD, AT, HT, MI, CD, CAD, NV-MD, CNV, HD-IS |                                                                          | DV, N, AP, PVD           | Up-reg | 1,52351 | 1,96048 | 4,81755 |
| P02751 | Fibronectin;Anastellin [FN1]                               | MI, CAD, HD-IS                             | A                                                                        | DV, V, A, N, AP, AT, PVD | Up-reg | 1,53176 | 1,86957 | 4,08379 |
| P30626 | Sorcin [SRI]                                               |                                            |                                                                          | N, AP                    | Up-reg | 1,88707 | 1,86935 | 2,21259 |

|               |                                                                               |                                                            |                                               |                          |          |         |          |          |
|---------------|-------------------------------------------------------------------------------|------------------------------------------------------------|-----------------------------------------------|--------------------------|----------|---------|----------|----------|
| <b>Q96PD5</b> | N-acetylmuramoyl-L-alanine amidase [PGLYRP2]                                  |                                                            |                                               |                          | Up-reg   | 1,31346 | 1,85426  | 1,78891  |
| <b>P02790</b> | Hemopexin [HPX]                                                               |                                                            |                                               |                          | Up-reg   | 1,45589 | 1,82852  | 3,38286  |
| <b>P68032</b> | Actin, alpha cardiac muscle 1 [ACTC1;ACTA1]                                   | AT                                                         |                                               |                          | Up-reg   | 1,71959 | 1,73749  | 2,19259  |
| <b>P02647</b> | Apolipoprotein A-I;Proapolipoprotein A-I;Truncated apolipoprotein A-I [APOA1] | AT, HT, MI, CD, DII, CAD, CVD, MIS                         |                                               | DV, V, A, N, AP, AT, PVD | Up-reg   | 1,30067 | 1,71092  | 3,67362  |
| <b>P02649</b> | Apolipoprotein E [APOE]                                                       | MD, AT, HT, MI, CD, DII, CAD, CVD, HD-IS, VTB, MIS, BH, TB | RECM, RECP, AD, RBVECM, NRECM, NRECP, NRBVECM | DV, V, A, N, AP, AT, PVD | Up-reg   | 2,06689 | 1,66861  | 1,62544  |
| <b>P00751</b> | Complement factor B [CFB]                                                     | MD, CD, DII, NV-MD, CNV                                    |                                               | DV, V, A                 | Up-reg   | 1,35963 | 1,64395  | 2,68609  |
| <b>P10412</b> | Histone H1.4 [HIST1H1E]                                                       |                                                            |                                               |                          | Up-reg   | 2,55638 | 1,58834  | 1,69159  |
| <b>P02545</b> | Prelamin-A/C [LMNA]                                                           | AT, DII                                                    |                                               | N, AP                    | Up-reg   | 1,33029 | 1,56473  | 1,28913  |
| <b>Q06828</b> | Fibromodulin [FMOD]                                                           | HT                                                         |                                               | DV, N, AP                | Up-reg   | 2,07132 | 1,41227  | 1,58552  |
| <b>P04792</b> | Heat shock protein beta-1 [HSPB1]                                             |                                                            | RA, RECM, RECC, PARA, RBVECM                  | DV, A, N, AP, PVD        | Up-reg   | 1,37688 | 1,36198  | 2,53005  |
| <b>Q96C19</b> | EF-hand domain-containing protein D2 [EFHD2]                                  |                                                            |                                               |                          | Down-reg | 1,82092 | -1,35279 | -1,56248 |
| <b>P38606</b> | V-type proton ATPase catalytic subunit A [ATP6V1A]                            |                                                            |                                               |                          | Down-reg | 2,3564  | -1,36788 | -1,46909 |
| <b>P68036</b> | Ubiquitin-conjugating enzyme E2 L3 [UBE2L3]                                   |                                                            |                                               | N                        | Down-reg | 2,05355 | -1,3685  | -1,39457 |
| <b>Q8NC51</b> | Plasminogen activator inhibitor 1 RNA-binding protein [SERBP1]                |                                                            |                                               |                          | Down-reg | 1,4266  | -1,37028 | -1,853   |
| <b>P13804</b> | Electron transfer flavoprotein subunit alpha, mitochondrial [ETFa]            |                                                            |                                               |                          | Down-reg | 2,08212 | -1,37874 | -1,47456 |
| <b>P62333</b> | 26S protease regulatory subunit 10B [PSMC6]                                   |                                                            |                                               | N                        | Down-reg | 1,80978 | -1,38455 | -1,7583  |
| <b>P46778</b> | 60S ribosomal protein L21 [RPL21]                                             |                                                            |                                               |                          | Down-reg | 1,49301 | -1,38506 | -1,78494 |
| <b>P07384</b> | Calpain-1 catalytic subunit [CAPN1]                                           |                                                            |                                               | DV, V, A, N, AP, PVD     | Down-reg | 2,05424 | -1,38779 | -1,519   |
| <b>Q9Y3Z3</b> | Deoxynucleoside triphosphate triphosphohydrolase SAMHD1 [SAMHD1]              |                                                            |                                               |                          | Down-reg | 1,36825 | -1,39775 | -1,68385 |
| <b>P05120</b> | Plasminogen activator inhibitor 2 [SERPINB2]                                  | DII-ED                                                     |                                               | N                        | Down-reg | 3,84344 | -1,39834 | -1,43621 |
| <b>P46926</b> | Glucosamine-6-phosphate isomerase 1 [GNPDA1]                                  |                                                            |                                               |                          | Down-reg | 2,31969 | -1,4037  | -1,58169 |
| <b>P48735</b> | Isocitrate dehydrogenase [NADP], mitochondrial [IDH2]                         |                                                            |                                               | N                        | Down-reg | 1,59202 | -1,40477 | -1,69282 |
| <b>Q13596</b> | Sorting nexin-1 [SNX1]                                                        |                                                            |                                               | N, AP                    | Down-reg | 1,45031 | -1,42052 | -1,89752 |

|               |                                                                                   |        |       |                 |          |         |          |          |
|---------------|-----------------------------------------------------------------------------------|--------|-------|-----------------|----------|---------|----------|----------|
| <b>P06744</b> | Glucose-6-phosphate isomerase [GPI]                                               |        | PRECM | N, AP           | Down-reg | 3,30528 | -1,42199 | -1,44301 |
| <b>P51572</b> | B-cell receptor-associated protein 31 [BCAP31]                                    |        |       | N, AP           | Down-reg | 1,64892 | -1,42289 | -1,69087 |
| <b>Q15907</b> | Ras-related protein Rab-11B [RAB11B;RAB11A]                                       |        |       |                 | Down-reg | 1,62331 | -1,42462 | -1,93442 |
| <b>P05387</b> | 60S acidic ribosomal protein P2 [RPLP2]                                           |        |       |                 | Down-reg | 2,10566 | -1,42581 | -1,52105 |
| <b>P11413</b> | Glucose-6-phosphate 1-dehydrogenase [G6PD]                                        | DII-ED |       | DV, V, A, N, AP | Down-reg | 1,75456 | -1,43054 | -1,54701 |
| <b>P09622</b> | Dihydrolipoyl dehydrogenase, mitochondrial [DLD]                                  |        |       |                 | Down-reg | 2,42723 | -1,44192 | -1,48184 |
| <b>Q9ULZ3</b> | Apoptosis-associated speck-like protein containing a CARD [PYCARD]                |        |       | N, AP           | Down-reg | 1,70653 | -1,44324 | -1,67997 |
| <b>P17987</b> | T-complex protein 1 subunit alpha [TCP1]                                          | DII-ED |       | N, AP           | Down-reg | 1,73033 | -1,4445  | -1,73961 |
| <b>O75368</b> | SH3 domain-binding glutamic acid-rich-like protein [SH3BGRL]                      |        |       |                 | Down-reg | 2,06454 | -1,45478 | -1,60867 |
| <b>P22897</b> | Macrophage mannose receptor 1 [MRC1]                                              |        |       |                 | Down-reg | 1,63366 | -1,48626 | -1,65647 |
| <b>Q9Y2J2</b> | Band 4.1-like protein 3;Band 4.1-like protein 3, N-terminally processed [EPB41L3] |        |       |                 | Down-reg | 1,50804 | -1,49585 | -1,96079 |
| <b>P20810</b> | Calpastatin [CAST]                                                                | DII-ED |       | N, AP           | Down-reg | 2,12564 | -1,49921 | -1,67422 |
| <b>P62277</b> | 40S ribosomal protein S13 [RPS13]                                                 |        |       | N               | Down-reg | 1,97026 | -1,50679 | -1,67412 |
| <b>P05141</b> | ADP/ATP translocase 2 [SLC25A5;SLC25A4]                                           |        |       |                 | Down-reg | 2,32393 | -1,51076 | -1,58079 |
| <b>P12955</b> | Xaa-Pro dipeptidase [PEPD]                                                        |        |       |                 | Down-reg | 3,99925 | -1,52204 | -1,56029 |
| <b>P05388</b> | 60S acidic ribosomal protein P0 [RPLP0;RPLP0P6]                                   |        |       |                 | Down-reg | 1,92405 | -1,53389 | -1,36861 |
| <b>P00491</b> | Purine nucleoside phosphorylase [PNP]                                             |        |       | N, AP           | Down-reg | 1,6357  | -1,53418 | -1,76698 |
| <b>Q9NRV9</b> | Heme-binding protein 1 [HEBP1]                                                    | DII-ED |       |                 | Down-reg | 1,70471 | -1,54247 | -1,9522  |
| <b>Q9P2E9</b> | Ribosome-binding protein 1 [RRBP1]                                                |        |       | AP, PVD         | Down-reg | 1,32535 | -1,54749 | -1,65367 |
| <b>Q7L576</b> | Cytoplasmic FMR1-interacting protein 1 [CYFIP1;CYFIP2]                            |        |       |                 | Down-reg | 2,55962 | -1,5503  | -1,67396 |
| <b>Q13177</b> | Serine/threonine-protein kinase PAK 2 [PAK2;PAK3]                                 |        |       |                 | Down-reg | 2,83287 | -1,55317 | -1,69814 |
| <b>P31949</b> | Protein S100-A11 [S100A11]                                                        |        |       | N, AP           | Down-reg | 2,572   | -1,55954 | -1,65173 |
| <b>P40227</b> | T-complex protein 1 subunit zeta [CCT6A]                                          |        |       | N               | Down-reg | 2,34308 | -1,56355 | -1,69742 |
| <b>P49207</b> | 60S ribosomal protein L34 [RPL34]                                                 |        |       | N               | Down-reg | 2,36568 | -1,57484 | -1,68979 |
| <b>Q9H0U4</b> | Ras-related protein Rab-1B [RAB1B;RAB1C]                                          |        |       |                 | Down-reg | 2,0209  | -1,58128 | -1,85923 |

|               |                                                                                                      |        |              |                     |          |         |          |          |
|---------------|------------------------------------------------------------------------------------------------------|--------|--------------|---------------------|----------|---------|----------|----------|
| <b>P43490</b> | Nicotinamide phosphoribosyltransferase [NAMPT]                                                       | DII-ED |              | N, AP               | Down-reg | 5,5009  | -1,59641 | -1,60329 |
| <b>P62750</b> | 60S ribosomal protein L23a [RPL23A]                                                                  |        |              |                     | Down-reg | 1,36639 | -1,62725 | -2,233   |
| <b>P23368</b> | NAD-dependent malic enzyme, mitochondrial [ME2]                                                      |        |              |                     | Down-reg | 2,51691 | -1,63148 | -1,72173 |
| <b>P38159</b> | RNA-binding motif protein, X chromosome [RBMX;RBMXL1]                                                |        |              |                     | Down-reg | 1,64196 | -1,63702 | -2,23973 |
| <b>P04899</b> | Guanine nucleotide-binding protein G(i) subunit alpha-2 [GNAI2]                                      | DII-ED |              | N, AP               | Down-reg | 1,51477 | -1,64588 | -1,98609 |
| <b>P99999</b> | Cytochrome c [CYCS]                                                                                  |        |              | DV, V, A, N, AP     | Down-reg | 1,77605 | -1,6564  | -1,83615 |
| <b>Q09666</b> | Neuroblast differentiation-associated protein AHNAK [AHNAK]                                          |        |              |                     | Down-reg | 3,04287 | -1,66397 | -1,6404  |
| <b>Q07020</b> | 60S ribosomal protein L18 [RPL18]                                                                    | DII-ED |              |                     | Down-reg | 1,59932 | -1,67484 | -2,60828 |
| <b>Q99538</b> | Legumain [LGMN]                                                                                      |        | PRECM, PRECC | N, AP               | Down-reg | 1,67923 | -1,67935 | -1,62799 |
| <b>P09601</b> | Heme oxygenase 1 [HMOX1]                                                                             | DII-ED | PRECM        | DV, V, A, N, AP, AT | Down-reg | 2,30319 | -1,68142 | -1,76302 |
| <b>P00915</b> | Carbonic anhydrase 1 [CA1]                                                                           |        |              | PVD                 | Down-reg | 2,23421 | -1,71386 | -1,47567 |
| <b>O94973</b> | AP-2 complex subunit alpha-2 [AP2A2]                                                                 |        |              | N, AP               | Down-reg | 2,36841 | -1,71875 | -1,79744 |
| <b>P48506</b> | Glutamate--cysteine ligase catalytic subunit [GCLC]                                                  |        |              | DV, V, A, N, AP     | Down-reg | 2,18445 | -1,72473 | -1,75925 |
| <b>P20618</b> | Proteasome subunit beta type-1 [PSMB1]                                                               |        |              | N, AP               | Down-reg | 1,67282 | -1,73787 | -2,23424 |
| <b>P05107</b> | Integrin beta-2 [ITGB2]                                                                              | DII-ED |              | DV, V, A, N, AP     | Down-reg | 1,43437 | -1,74988 | -2,82013 |
| <b>O75396</b> | Vesicle-trafficking protein SEC22b [SEC22B]                                                          |        |              |                     | Down-reg | 2,04251 | -1,75399 | -2,08281 |
| <b>P22102</b> | Trifunctional purine biosynthetic protein adenosine-3 [GART]                                         |        |              |                     | Down-reg | 3,76937 | -1,76718 | -1,81265 |
| <b>P27635</b> | 60S ribosomal protein L10 [RPL10]                                                                    | DII-ED |              | N, AP               | Down-reg | 2,09631 | -1,78761 | -2,09582 |
| <b>Q13765</b> | Nascent polypeptide-associated complex subunit alpha[NACA]                                           |        |              |                     | Down-reg | 2,45714 | -1,7887  | -2,04725 |
| <b>P54577</b> | Tyrosine--tRNA ligase, cytoplasmic;Tyrosine--tRNA ligase, cytoplasmic, N-terminally processed [YARS] |        |              | DV, V, A, N, AP     | Down-reg | 4,71201 | -1,79676 | -1,82519 |
| <b>P29350</b> | Tyrosine-protein phosphatase non-receptor type 6 [PTPN6]                                             |        |              | DV, V, A, N, AP     | Down-reg | 2,98869 | -1,81359 | -1,95051 |
| <b>P57737</b> | Coronin-7 [CORO7]                                                                                    |        |              |                     | Down-reg | 2,25326 | -1,82253 | -2,07896 |
| <b>P49411</b> | Elongation factor Tu, mitochondrial [TUFM]                                                           |        |              | N                   | Down-reg | 1,88585 | -1,82583 | -2,21553 |
| <b>Q14204</b> | Cytoplasmic dynein 1 heavy chain 1 [DYNC1H1]                                                         |        |              | N, AP               | Down-reg | 1,86789 | -1,83118 | -2,44281 |

|               |                                                                               |              |              |          |         |          |          |
|---------------|-------------------------------------------------------------------------------|--------------|--------------|----------|---------|----------|----------|
| <b>P30740</b> | Leukocyte elastase inhibitor [SERPINB1]                                       |              | AP           | Down-reg | 2,86062 | -1,83651 | -1,85937 |
| <b>P04080</b> | Cystatin-B [CSTB]                                                             | DII-ED       | N, AP        | Down-reg | 1,71761 | -1,85654 | -2,209   |
| <b>O15400</b> | Syntaxin-7 [STX7]                                                             |              | DV, V, A     | Down-reg | 3,06699 | -1,85937 | -1,92248 |
| <b>P11766</b> | Alcohol dehydrogenase class-3 [ADH5]                                          |              | N, AP        | Down-reg | 2,35907 | -1,88555 | -2,37594 |
| <b>P30046</b> | D-dopachrome decarboxylase;D-dopachrome decarboxylase-like protein [DDT;DDTL] | DII-ED       |              | Down-reg | 3,87656 | -1,90986 | -1,95081 |
| <b>P62979</b> | Ubiquitin-40S ribosomal protein S27a [RPS27A;UBA52;UBB;UBC]                   | DII-ED       |              | Down-reg | 2,44263 | -1,91284 | -1,76344 |
| <b>P61254</b> | 60S ribosomal protein L26;60S ribosomal protein L26-like 1 [RPL26;RPL26L1]    |              |              | Down-reg | 2,11036 | -1,91526 | -2,35411 |
| <b>P63000</b> | Ras-related C3 botulinum toxin substrate 1 [RAC1;RAC3]                        |              |              | Down-reg | 2,58021 | -1,91988 | -2,1965  |
| <b>P62328</b> | Thymosin beta-4 [TMSB4X]                                                      | PRECM, PRECC | N, AP        | Down-reg | 2,35961 | -1,95009 | -1,97773 |
| <b>Q8TD55</b> | Pleckstrin homology domain-containing family O member 2 [PLEKHO2]             |              | PVD          | Down-reg | 2,1621  | -1,9704  | -2,50221 |
| <b>Q10567</b> | AP-1 complex subunit beta-1 [AP1B1]                                           |              |              | Down-reg | 3,44594 | -1,97308 | -2,0932  |
| <b>Q02818</b> | Nucleobindin-1 [NUCB1]                                                        |              |              | Down-reg | 2,36298 | -1,98561 | -2,56096 |
| <b>P08575</b> | Receptor-type tyrosine-protein phosphatase C [PTPRC]                          |              | N, AP        | Down-reg | 1,5796  | -2,03222 | -1,86929 |
| <b>P07900</b> | Heat shock protein HSP 90-alpha [HSP90AA1]                                    | DII-ED       | DV, A, N, AP | Down-reg | 3,50808 | -2,04896 | -2,09066 |
| <b>P31948</b> | Stress-induced-phosphoprotein 1 [STIP1]                                       |              | N, AP, PVD   | Down-reg | 2,06037 | -2,07716 | -2,53916 |
| <b>Q8WZ42</b> | Titin [TTN]                                                                   | DII-ED       | N, AP        | Down-reg | 2,74687 | -2,15207 | -2,30585 |
| <b>O15144</b> | Actin-related protein 2/3 complex subunit 2 [ARPC2]                           |              |              | Down-reg | 2,69524 | -2,15733 | -2,17038 |
| <b>P48643</b> | T-complex protein 1 subunit epsilon [CCT5]                                    |              | N            | Down-reg | 2,10431 | -2,15874 | -2,74118 |
| <b>P27824</b> | Calnexin [CANX]                                                               | DII-ED       | AP           | Down-reg | 3,22914 | -2,17833 | -2,20474 |
| <b>P22234</b> | Multifunctional protein ADE2 [PAICS]                                          |              |              | Down-reg | 3,07392 | -2,1816  | -2,3894  |
| <b>P63244</b> | Guanine nucleotide-binding protein subunit beta-2-like 1 [GNB2L1]             |              | N, AP        | Down-reg | 2,44066 | -2,22585 | -2,25096 |
| <b>Q14764</b> | Major vault protein [MVP]                                                     |              | N, AP        | Down-reg | 2,66291 | -2,22658 | -2,39029 |
| <b>P07948</b> | Tyrosine-protein kinase Lyn [LYN]                                             |              | N, AP, PVD   | Down-reg | 3,69766 | -2,24575 | -2,34153 |
| <b>P29966</b> | Myristoylated alanine-rich C-kinase substrate [MARCKS]                        |              | PVD          | Down-reg | 2,57345 | -2,28512 | -2,31326 |

|               |                                                     |        |                      |          |         |          |          |
|---------------|-----------------------------------------------------|--------|----------------------|----------|---------|----------|----------|
| <b>P35754</b> | Glutaredoxin-1 [GLRX]                               |        | DV, V, A, N, AP, PVD | Down-reg | 3,0061  | -2,28758 | -2,51191 |
| <b>Q16851</b> | UTP--glucose-1-phosphate uridylyltransferase [UGP2] |        |                      | Down-reg | 1,99549 | -2,30258 | -2,60516 |
| <b>P48444</b> | Coatomer subunit delta [ARCN1]                      |        | N                    | Down-reg | 3,29111 | -2,34547 | -2,59126 |
| <b>P00352</b> | Retinal dehydrogenase 1 [ALDH1A1]                   |        | N, AP                | Down-reg | 2,79786 | -2,36968 | -2,51627 |
| <b>Q00610</b> | Clathrin heavy chain 1 [CLTC]                       | DII-ED | N, AP                | Down-reg | 3,20013 | -2,38527 | -2,60164 |
| <b>P80723</b> | Brain acid soluble protein 1 [BASP1]                |        | AP                   | Down-reg | 2,08773 | -2,40163 | -2,91805 |
| <b>P08238</b> | Heat shock protein HSP 90-beta [HSP90AB1]           | DII-ED | N, AP                | Down-reg | 2,76504 | -2,44728 | -2,62333 |
| <b>Q9UJ70</b> | N-acetyl-D-glucosamine kinase [NAGK]                |        |                      | Down-reg | 3,43288 | -2,58085 | -2,82621 |
| <b>Q96CW1</b> | AP-2 complex subunit mu [AP2M1]                     |        | N, AP                | Down-reg | 3,23713 | -2,58161 | -2,80052 |
| <b>P02730</b> | Band 3 anion transport protein [SLC4A1]             | DII-ED |                      | Down-reg | 3,32109 | -2,61667 | -2,75014 |
| <b>O00244</b> | Copper transport protein ATOX1 [ATOX1]              |        | AP                   | Down-reg | 2,95074 | -2,63457 | -3,11532 |
| <b>P07108</b> | Acyl-CoA-binding protein [DBI]                      |        |                      | Down-reg | 4,61842 | -2,67264 | -2,74791 |
| <b>P23284</b> | Peptidyl-prolyl cis-trans isomerase B [PPIB]        |        |                      | Down-reg | 2,11906 | -2,77179 | -2,63302 |
| <b>P32969</b> | 60S ribosomal protein L9 [RPL9]                     |        | N, PVD               | Down-reg | 4,47439 | -2,93634 | -3,0413  |
| <b>P51659</b> | Peroxisomal multifunctional enzyme type 2 [HSD17B4] | DII-ED |                      | Down-reg | 3,84746 | -3,96407 | -3,94417 |
| <b>P62191</b> | 26S protease regulatory subunit 4 [PSMC1]           |        | N                    | Down-reg | 5,37239 | -4,49194 | -4,67209 |

**Supplementary Table S2. Functional and disease classification of proteins differentially released by CAC in response to the incubation with atherosclerotic factors.**

Protein classification was made with the IPA software, based on biomedical literature and integrated databases. The table includes the main categories in which differential proteins are involved, related functions or diseases, predicted activation or inhibition for these functions, number of molecules per category identified in the AP secretome, the p-values assigned and the gene names. The p-value provided by IPA is calculated using the right-tailed Fisher Exact Test, and it represents the likelihood that the association between a set of focus genes in your experiment and a given process or pathway is due to random chance. The smaller the p-value the less likely that the association is random and the more significant the association. P-values <0.05 are statistically significant. Functions discussed within the min manuscript are shown in **bold letters**. Legend: ↑ up-regulated; ↓ down-regulated

| Categories                        | Disease or Functions Annotation         | Predicted         | Molecules | p-value                    | Molecules                                                                                                                                                                                                                                                                                                                                                              |
|-----------------------------------|-----------------------------------------|-------------------|-----------|----------------------------|------------------------------------------------------------------------------------------------------------------------------------------------------------------------------------------------------------------------------------------------------------------------------------------------------------------------------------------------------------------------|
| Cardiovascular System Development | Cell movement of endothelial cell lines | Inhibition        | 12        | 1.12E <sup>-9</sup>        | ↑CDH13, ↑FN1, ↑VTN, ↑SERPINF1, ↑KNG1, ↑MYH11, ↑TNC, ↑IGHG1, ↑APOE, ↑THBS1, ↑COL18A1, ↓YARS                                                                                                                                                                                                                                                                             |
|                                   | <b>Cell movement of EC</b>              | <b>Inhibition</b> | <b>20</b> | <b>1.01E<sup>-8</sup></b>  | ↑CDH13, ↑SERPINF1, ↑APOH, ↑THBS1, ↑COL18A1, ↑HSPB1, ↑FN1, ↑VTN, ↑ORM1, ↑THBS2, ↑KNG1, ↑HSPG2, ↑APOE, ↓G6PD, ↓ITGB2, ↓PTPN6, ↓HSP90AB1, ↓GPI, ↓TMSB10/TMSB4X, ↓MARCKS                                                                                                                                                                                                   |
|                                   | Development of vasculature              | Inhibition        | 48        | 1.58E <sup>-15</sup>       | ↑FBLN2, ↑CFB, ↑C3, ↑EMILIN1, ↑SERPINF1, ↑APOH, ↑HTRA1, ↑THBS1, ↑CFH, ↑FN1, ↑FBLN5, ↑KNG1, ↑MYH11, ↑IGHM, ↑TNC, ↑IGHG1, ↑F2, ↑CDH13, ↑FBN1, ↑COL15A1, ↑MYH10, ↑C6, ↑COL18A1, ↑HSPB1, ↑FBLN1, ↑VTN, ↑IGFBP7, ↑CLU, ↑ORM1, ↑THBS2, ↑APOA1, ↑HSPG2, ↑APOE, ↑LUM, ↑FMOD, ↑TGM2, ↑LTBP1, ↓YARS, ↓ITGB2, ↓CYCS, ↓PTPN6, ↓STX7, ↓HSP90AA1, ↓G6PD, ↓GCLC, ↓GLRX, ↓CAPN1, ↓HMOX1 |
|                                   | <b>EC development</b>                   | <b>Inhibition</b> | <b>16</b> | <b>4.54E<sup>-6</sup></b>  | ↑CDH13, ↑C3, ↑SERPINF1, ↑APOH, ↑THBS1, ↑COL18A1, ↑FN1, ↑VTN, ↑KNG1, ↑APOA1, ↑HSPG2, ↑IGHG1, ↑APOE, ↑F2, ↓G6PD, ↓HMOX1                                                                                                                                                                                                                                                  |
|                                   | <b>Migration of EC</b>                  | <b>Inhibition</b> | <b>18</b> | <b>7.64E<sup>-8</sup></b>  | ↑CDH13, ↑SERPINF1, ↑APOH, ↑THBS1, ↑COL18A1, ↑HSPB1, ↑FN1, ↑VTN, ↑ORM1, ↑KNG1, ↑APOE, ↓G6PD, ↓ITGB2, ↓PTPN6, ↓HSP90AB1, ↓GPI, ↓TMSB10/TMSB4X, ↓MARCKS                                                                                                                                                                                                                   |
|                                   | Morphology of blood vessel              | ---               | 22        | 2.23E <sup>-11</sup>       | ↑FBN1, ↑COL15A1, ↑MYH10, ↑CFH, ↑FBLN1, ↑FBLN5, ↑FN1, ↑VTN, ↑CLU, ↑THBS2, ↑KNG1, ↑MYH11, ↑HSPG2, ↑APOE, ↑LUM, ↑FMOD, ↑LTBP1, ↓G6PD, ↓GCLC, ↓HMOX1                                                                                                                                                                                                                       |
|                                   | <b>Vasculogenesis</b>                   | <b>Activation</b> | <b>37</b> | <b>4.10E<sup>-13</sup></b> | ↑CFB, ↑C3, ↑SERPINF1, ↑APOH, ↑HTRA1, ↑THBS1, ↑FN1, ↑FBLN5, ↑KNG1, ↑TNC, ↑IGHG1, ↑F2, ↑CDH13, ↑COL15A1, ↑MYH10, ↑C6, ↑COL18A1, ↑FBLN1, ↑VTN, ↑IGFBP7, ↑ORM1, ↑THBS2, ↑APOA1, ↑HSPG2, ↑APOE, ↑TGM2, ↑LTBP1, ↓YARS, ↓ITGB2, ↓CYCS, ↓PTPN6, ↓STX7, ↓G6PD, ↓GCLC, ↓GLRX, ↓CAPN1, ↓HMOX1                                                                                     |
|                                   | Adhesion of EC                          | Activation        | 11        | 2.21E <sup>-7</sup>        | ↑FBLN5, ↑FN1, ↑VTN, ↑IGFBP7, ↑THBS1, ↑COL18A1, ↑F2, ↓RACK1, ↓ITGB2,                                                                                                                                                                                                                                                                                                    |

|                         |                        |            |    |                      |                                                                                                                                                                                                                                                                                                                                                                                                                                                                                                                                                                                                                                                                                                                                     |
|-------------------------|------------------------|------------|----|----------------------|-------------------------------------------------------------------------------------------------------------------------------------------------------------------------------------------------------------------------------------------------------------------------------------------------------------------------------------------------------------------------------------------------------------------------------------------------------------------------------------------------------------------------------------------------------------------------------------------------------------------------------------------------------------------------------------------------------------------------------------|
|                         |                        |            |    |                      | ↓TMSB10/TMSB4X, ↓SLC4A1                                                                                                                                                                                                                                                                                                                                                                                                                                                                                                                                                                                                                                                                                                             |
|                         | Angiogenesis           | Inhibition | 41 | 6.80E <sup>-13</sup> | ↑FBLN2, ↑CFB, ↑C3, ↑EMILIN1, ↑SERPINF1, ↑APOH, ↑HTRA1, ↑THBS1, ↑FN1, ↑FBLN5, ↑KNG1, ↑TNC, ↑IGHG1, ↑F2, ↑CDH13, ↑COL15A1, ↑MYH10, ↑C6, ↑COL18A1, ↑HSPB1, ↑FBLN1, ↑VTN, ↑IGFBP7, ↑ORM1, ↑THBS2, ↑APOA1, ↑HSPG2, ↑APOE, ↑TGM2, ↑LTBP1, ↓YARS, ↓ITGB2, ↓CYCS, ↓PTPN6, ↓STX7, ↓HSP90AA1, ↓G6PD, ↓GCLC, ↓GLRX, ↓CAPN1, ↓HMOX1                                                                                                                                                                                                                                                                                                                                                                                                             |
|                         | Binding of EC          | Activation | 15 | 1.36E <sup>-9</sup>  | ↑C3, ↑THBS1, ↑COL18A1, ↑LPA, ↑FBLN5, ↑FN1, ↑VTN, ↑IGFBP7, ↑KNG1, ↑F2, ↑BGN, ↓RACK1, ↓ITGB2, ↓TMSB10/TMSB4X, ↓SLC4A1                                                                                                                                                                                                                                                                                                                                                                                                                                                                                                                                                                                                                 |
|                         | Binding of vascular EC | Inhibition | 10 | 4.51E <sup>-7</sup>  | ↑FN1, ↑VTN, ↑IGFBP7, ↑KNG1, ↑THBS1, ↑F2, ↑BGN, ↓RACK1, ↓ITGB2, ↓TMSB10/TMSB4X                                                                                                                                                                                                                                                                                                                                                                                                                                                                                                                                                                                                                                                       |
| Cell death and survival | Cell survival          | Inhibition | 42 | 1.95E <sup>-7</sup>  | ↑CD59, ↑C3, ↑VCL, ↑SERPINF1, ↑THBS1, ↑CFH, ↑LMNA, ↑FN1, ↑MYH11, ↑IGHM, ↑F2, ↑CDH13, ↑COL18A1, ↑HSPB1, ↑POSTN, ↑SOD3, ↑VTN, ↑IGFBP7, ↑CLU, ↑THBS2, ↑VCAN, ↑APOE, ↑TGM2, ↓ITGB2, ↓ADH5, ↓SERPINB2, ↓PRPN6, ↓UBE2L3, ↓GCLC, ↓GLRX, ↓RACK1, ↓CAPN1, ↓TCP1, ↓PPIB, ↓HMOX1, ↓PYCARD, ↓NAMPT, ↓PTPRC, ↓HSP90AB1, ↓BCAP31, ↓MVP, ↓LYN                                                                                                                                                                                                                                                                                                                                                                                                       |
|                         | Necrosis               | Activation | 92 | 2.54E <sup>-23</sup> | ↑C3, ↑SERPINF1, ↑HTRA1, ↑HIST1H2BO, ↑THBS1, ↑LMNA, ↑MYH11, ↑TNC, ↑IGHM, ↑F2, ↑C7, ↑HSPB1, ↑FBLN1, ↑SOD3, ↑PDLIM7, ↑CLU, ↑THBS2, ↑VCAN, ↑APOA1, ↑FMOD, ↑TGM2, ↑TTR, ↑CD59, ↑EFEMP1, ↑COL6A1, ↑SRI, ↑CFH, ↑FN1, ↑KNG1, ↑IGHG1, ↑C9, ↑TPM1, ↑CD5L, ↑MYH10, ↑COL18A1, ↑POSTN, ↑VTN, ↑IGFBP7, ↑APOE, ↑LUM, ↑BGN, ↑LTBP1, ↓YARS, ↓LGMN, ↓TUFM, ↓ITGB2, ↓CYCS, ↓RPS13, ↓ALDH1A1, ↓SERPINB2, ↓GPI, ↓UBE2L3, ↓DYNC1H1, ↓CLTC, ↓CSTB, ↓TCP1, ↓PSMC6, ↓IDH2, ↓LYN, ↓CCT6A, ↓STIP1, ↓PSMB1, ↓RPL9, ↓SNX1, ↓GNAI2, ↓ADH5, ↓PSMC1, ↓PNP, ↓PTPN6, ↓HSP90AA1, ↓CCT5, ↓S100A11, ↓G6PD, ↓GCLC, ↓GLRX, ↓RACK 1, ↓CAPN1, ↓HMOX1, ↓PYCARD, ↓NAMPT, ↓AP2A2, ↓CAST, ↓RPL34, ↓PTPRC, ↓AP2M1, ↓HSP90AB1, ↓TTN, ↓ARCN1, ↓BCAP31, ↓TMSB10/TMSB4X, ↓RPL10, ↓MVP |
|                         | Apoptosis              | Inhibition | 84 | 2.10E <sup>-18</sup> | ↑VCL, ↑C3, ↑SERPINF1, ↑HTRA1, ↑THBS1, ↑LMNA, ↑MYH11, ↑TNC, ↑IGHM, ↑F2, ↑FBN1, ↑C6, ↑HSPB1, ↑FBLN1, ↑SOD3, ↑PDLIM7, ↑CLU, ↑THBS2, ↑VCAN, ↑APOA1, ↑HSPG2, ↑FMOD, ↑TGM2, ↑TTR, ↑CD59, ↑EFEMP1, ↑SRI, ↑CFH, ↑FN1, ↑KNG1, ↑IGHG1, ↑TPM1, ↑CD5L, ↑MYH10, ↑COL18A1, ↑VTN, ↑IGFBP7, ↑APOE, ↑LUM, ↑BGN, ↑LTBP1, ↓YARS, ↓LGMN, ↓BASP1, ↓ITGB2, ↓CYCS, ↓ALDH1A1, ↓GPI, ↓DYNC1H1, ↓CLTC, ↓CSTB, ↓TCP1, ↓ATOX1,                                                                                                                                                                                                                                                                                                                                  |



|                                        |                                 |                   |           |                           |                                                                                                                                                                                                                                                                     |
|----------------------------------------|---------------------------------|-------------------|-----------|---------------------------|---------------------------------------------------------------------------------------------------------------------------------------------------------------------------------------------------------------------------------------------------------------------|
|                                        |                                 |                   |           |                           | <p>↓LYN, ↓SERPINB1, ↓STIP1, ↓PSMB1, ↓SNX1, ↓GNAI2, ↓ADH5, ↓CANX, ↓PNP, ↓PTPN6, ↓HSP90AA1, ↓S100A11, ↓G6PD, ↓GCLC, ↓GLRX, ↓RACK1, ↓CAPN1, ↓RRBP1, ↓HMOX1, ↓PYCARD, ↓NAMPT, ↓AP2A2, ↓CAST, ↓PTPRC, ↓AP2M1, ↓HSP90AB1, ↓TTN, ↓BCAP31, ↓TMSB10/TMSB4X, ↓RPL10, ↓MVP</p> |
| Cell to cell signaling and interaction | Adhesion of blood cells         | Activation        | 29        | 1.32E <sup>-16</sup>      | <p>↑CD59, ↑C3, ↑APOH, ↑THBS1, ↑CFH, ↑FN1, ↑KNG1, ↑IGHM, ↑TNC, ↑F2, ↑VTN, CLU, ↑ORM1, ↑THBS2, ↑APOA1, ↑C4BPA, ↑CFP, ↑HSPG2, ↑APOE, ↑TGM2, ↓ITGB2, ↓GNAI2, ↓MRC1, ↓PTPN6, ↓SLC4A1, ↓GLRX, ↓PPIB, ↓PTPRC, ↓LYN</p>                                                     |
|                                        | Aggregation of blood cells      | Activation        | 18        | 2.67E <sup>-11</sup>      | <p>↑C3, ↑SERPINF1, ↑THBS1, ↑CFH, ↑GPX3, ↑VTN, ↑CLU, ↑THBS2, ↑KNG1, ↑C4BPA, ↑IGHM, ↑F2, ↓CAPN1, ↓ITGB2, ↓GNAI2, ↓CAST, ↓PTPN6, ↓LYN</p>                                                                                                                              |
|                                        | Binding of blood cells          | Activation        | 30        | 4.71E <sup>-16</sup>      | <p>↑CD59, ↑C3, ↑APOH, ↑THBS1, ↑CFH, ↑LPA, ↑FN1, ↑KNG1, ↑IGHM, ↑TNC, F2, ↑VTN, ↑CLU, ↑ORM1, ↑THBS2, ↑APOA1, ↑C4BPA, ↑CFP, ↑HSPG2, ↑APOE, ↑TGM2, ↓ITGB2, ↓GNAI2, ↓MRC1, ↓PTPN6, ↓SLC4A1, ↓GLRX, ↓PPIB, ↓PTPRC, ↓LYN</p>                                               |
|                                        | Phagocytosis by macrophages     | Inhibition        | 9         | 5.92E <sup>-6</sup>       | <p>↑CD5L, ↑VTN, ↑C2, ↑THBS1, ↑LUM, ↑TGM2, ↓ITGB2, ↓PTPRC, ↓HMOX1</p>                                                                                                                                                                                                |
|                                        | Phagocytosis of blood cells     | Inhibition        | 13        | 2.29E <sup>-8</sup>       | <p>↑CD5L, ↑C3, ↑THBS1, ↑CFH, ↑VTN, ↑APOA1, ↑LUM, ↑TGM2, ↓GLRX, ↓ITGB2, ↓HMOX1, ↓PTPRC, ↓LYN</p>                                                                                                                                                                     |
|                                        | Activation of blood cells       | Activation        | 30        | 2.74E <sup>-9</sup>       | <p>↑CD59, ↑C3, ↑SERPINF1, ↑APOH, ↑THBS1, ↑CFH, ↑FN1, ↑KNG1, ↑IGHM, ↑TNC, ↑IGHG1, ↑F2, ↑C6, ↑VTN, ↑VCAN, ↑APOA1, ↑HSPG2, ↑APOE, ↑PGLYRP2, ↑TGM2, ↑LTBP1, ↓ITGB2, ↓GNAI2, ↓PTPN6, ↓HEBP1, ↓HMOX1, ↓PYCARD, ↓PTPRC, ↓AHNAK, ↓LYN</p>                                   |
| Cardiovascular Disease                 | <b>Atherosclerotic lesion</b>   | <b>Inhibition</b> | <b>11</b> | <b>1.13E<sup>-6</sup></b> | <p>↑LPA, ↑CD59, ↑FN1, ↑VCAN, ↑APOA1, ↑HSPG2, ↑IGHG1, ↑APOE, ↑THBS1, ↑COL18A1, ↓HMOX1</p>                                                                                                                                                                            |
|                                        | Familial cardiovascular disease | ---               | 24        | 8.27E <sup>-10</sup>      | <p>↑FBN1, ↑CFB, ↑C3, ↑VCL, ↑HTRA1, ↑THBS1, ↑CFH, ↑LMNA, ↑LPA, ↑GBLN1, ↑TINAGL1, ↑IGFBP7, ↑THBS2, ↑MYH11, ↑APOA1, ↑HSPG2, ↑APOE, ↑TPM1, ↑F2, ↑BGN, ↑LTBP1, ↑TTR, ↓GNAI2, ↓TTN</p>                                                                                    |
|                                        | Familial vascular disease       | ---               | 14        | 2.12E <sup>-7</sup>       | <p>↑FBN1, ↑CFB, ↑C3, ↑HTRA1, ↑THBS1, ↑CFH, ↑TINAGL1, ↑IGFBP7, ↑THBS2, ↑MYH11, ↑HSPG2, ↑F2, ↑BGN, ↓LTBP1</p>                                                                                                                                                         |
|                                        | Peripheral vascular disease     | Inhibition        | 23        | 2.42E <sup>-9</sup>       | <p>↑COL6A1, ↑APOH, ↑HTRA1, ↑THBS1, ↑CFH, ↑LPA, ↑HSPB1, ↑FN1, ↑GPX3, ↑TINAGL1, ↑CLU, ↑THBS2, ↑APOA1, ↑APOE, ↑F2, ↓GLRX, ↓RRBP1, ↓STIP1, ↓PLEKHO2, ↓RPL9, ↓CA1, ↓MARCKS, ↓LYN</p>                                                                                     |
|                                        | Thrombus                        | ---               | 14        | 5.28E <sup>-8</sup>       | <p>↑FBN1, ↑CFB, ↑C3, ↑APOH, ↑THBS1, ↑CFH, ↑LPA, ↑GPX3, ↑VTN, ↑KNG1, ↑APOE, ↑F2, ↓CAPN1, ↓HMOX1</p>                                                                                                                                                                  |

|                                               |                                     |                   |           |                            |                                                                                                                                                                                                                                                                                                     |
|-----------------------------------------------|-------------------------------------|-------------------|-----------|----------------------------|-----------------------------------------------------------------------------------------------------------------------------------------------------------------------------------------------------------------------------------------------------------------------------------------------------|
|                                               | Thrombosis of artery                | ---               | 5         | 7.18E <sup>-6</sup>        | ↑APOH, ↑APOE, ↑THBS1, ↑F2, ↓CAPN1                                                                                                                                                                                                                                                                   |
|                                               | <b>Vascular lesion</b>              | <b>Inhibition</b> | <b>16</b> | <b>7.59E<sup>-9</sup></b>  | ↑CD59, ↑FBN1, ↑THBS1, ↑COL18A1, ↑LPA, ↑FN1, ↑IGFBP7, ↑VCAN, ↑MYH11, ↑APOA1, ↑HSPG2, ↑IGHG1, ↑APOE, ↓RRBP1, ↓HMOX1, ↓PTPRC                                                                                                                                                                           |
|                                               | Abnormal morphology of blood vessel | ---               | 15        | 1.13E <sup>-7</sup>        | ↑FBN1, ↑COL15A1, ↑CFH, ↑FBLN1, ↑FN1, ↑CLU, ↑THBS2, ↑MYH11, ↑HSPG2, ↑APOE, ↑LUM, ↑FMOD, ↑LTBP1, ↓G6PD, ↓HMOX1                                                                                                                                                                                        |
| Endocrine System Disorders                    | Diabetic complication               | ---               | 13        | 2.50E <sup>-6</sup>        | ↑COL14A1, ↑COL15A1, ↑COL6A3, ↑SERPINF1, ↑COL6A1, ↑COL18A1, ↑COL12A1, ↑FN1, ↑CLU, ↑APOE, ↑CLEC3B, ↑AMBIP, ↓CA1                                                                                                                                                                                       |
|                                               | Diabetic foot ulcer disorder        | ---               | 6         | 3.24E <sup>-6</sup>        | ↑COL12A1, ↑COL14A1, ↑COL15A1, ↑COL6A3, ↑COL6A1, ↑COL18A1                                                                                                                                                                                                                                            |
|                                               | Diabetes mellitus                   | ---               | 39        | 6.06E <sup>-10</sup>       | ↑CFB, ↑COL14A1, ↑C3, ↑SERPINF1, ↑COL6A1, ↑HIST1H2BO, ↑CFH, ↑LMNA, ↑LPA, ↑COL12A1, ↑FN1, ↑MYH11, ↑IGHM, ↑TNC, ↑IGHG1, ↑CLEC3B, ↑AMBIP, ↑AEBP1, ↑COL15A1, ↑COL6A3, ↑COL18A1, ↑HSPB1, ↑IGFBP7, ↑THBS2, ↑CLU, ↑TNXB, ↑APOA1, ↑APOE, ↑TGM2, ↑TTR, ↓ITGB2, ↓PSMB1, ↓MRC1, ↓ALDH1A1, ↓CANX, ↓PTPRC, ↓PSMC6 |
| Hematological system development and function | Coagulation of blood                | Inhibition        | 17        | 8.80E <sup>-9</sup>        | ↑CD59, ↑C3, ↑SERPINF1, ↑APOH, ↑THBS1, ↑VTN, ↑THBS2, ↑KNG1, ↑VCAN, ↑HSPG2, ↑APOE, ↑C9, ↑F2, ↓CAPN1, ↓GNAI2, ↓PTPN6, ↓LYN                                                                                                                                                                             |
|                                               | Hemostasis                          | Activation        | 23        | 1.07E <sup>-12</sup>       | ↑CD59, ↑C3, ↑SERPINF1, ↑APOH, ↑THBS1, ↑LPA, ↑FN1, ↑VTN, ↑THBS2, ↑VCAN, ↑KNG1, ↑IGHM, ↑HSPG2, ↑APOE, ↑C9, ↑F2, ↓CAPN1, ↓PPIB, ↓GNAI2, ↓SERPINB2, ↓PTPN6, ↓GPI, ↓LYN                                                                                                                                  |
|                                               | Accumulation of blood cells         | Inhibition        | 15        | 3.94E <sup>-7</sup>        | ↑CD5L, ↑C3, ↑C6, ↑THBS1, ↑COL18A1, ↑POSTN, ↑APOA1, ↑IGHG1, ↑APOE, ↑F2, ↑BGN, ↓ITGB2, ↓HMOX1, ↓GNAI2, ↓LYN                                                                                                                                                                                           |
| Inflammatory response                         | Immune response of cells            | Inhibition        | 32        | 8.92E <sup>-14</sup>       | ↑CD59, ↑C3, ↑THBS1, ↑CFH, ↑FN1, ↑IGHA2, ↑IGHM, ↑IGHG1, ↑IGKC, ↑CD5L, ↑HSPB1, ↑POSTN, ↑VTN, ↑APOA1, ↑APOE, ↑LUM, ↑TGM2, ↑LTBP1, ↓ITGB2, ↓MRC1, ↓PNP, ↓PTPN6, ↓HSP90AA1, ↓UBE2L3, ↓GLRX, ↓RACK1, ↓CLTC, ↓HMOX1, ↓PYCARD, ↓NAMPT, ↓PTPRC, ↓LYN                                                         |
|                                               | <b>Inflammatory response</b>        | <b>Activation</b> | <b>38</b> | <b>9.27E<sup>-14</sup></b> | ↑C3, ↑SERPINF1, ↑APOH, ↑THBS1, ↑CFH, ↑LPA, ↑FN1, ↑KNG1, ↑IGHM, ↑TNC, ↑IGHG1, ↑F2, ↑C6, ↑COL18A1, ↑HSPB1, ↑SOD3, ↑VTN, ↑ORM1, ↑THBS2, ↑APOA1, ↑HSPG2, ↑APOE, ↑PGLYRP2, ↑LUM, ↑TGM2, ↑LTBP1, ↓SERPINB1, ↓YARS, ↓LGMN, ↓ITGB2, ↓GNAI2, ↓PTPN6, ↓HEBP1, ↓PPIB, ↓HMOX1, ↓PYCARD, ↓TMSB10/TMSB4X, ↓LYN    |



**Supplementary Table S4.** Differential proteins identified in the secretome of CAC after incubation *ex vivo* with atherosclerotic factors related to TGFβ1 signaling pathways. According to IPA, TGFβ1 signaling pathway was predicted to be activated, given the number (41 of 67 related proteins) involved in the activation of these pathways

TGFβ1

Printed: julio 12, 2020

IPA Build version: exported

| ID     | Genes in dataset | Prediction (based on measurement direction) | Expr Other | Findings           |
|--------|------------------|---------------------------------------------|------------|--------------------|
| P18206 | VCL              | Activated                                   | ↑1.000     | Upregulates, (3)   |
| P01024 | C3               | Inhibited                                   | ↓1.000     | Downregulates, (1) |
| P36955 | SERPINF1         | Inhibited                                   | ↓1.000     | Downregulates, (2) |
| Q92743 | HTRA1            | Activated                                   | ↑1.000     | Upregulates, (2)   |
| P07996 | THBS1            | Activated                                   | ↑1.000     | Upregulates, (14)  |
| P35749 | MYH11            | Activated                                   | ↑1.000     | Upregulates, (18)  |
| P01871 | IGHM             | Inhibited                                   | ↓1.000     | Downregulates, (1) |
| P24821 | TNC              | Activated                                   | ↑1.000     | Upregulates, (18)  |
| Q01995 | TAGLN            | Activated                                   | ↑1.000     | Upregulates, (63)  |
| P00734 | F2               | Inhibited                                   | ↓1.000     | Downregulates, (1) |
| P35555 | FBN1             | Activated                                   | ↑1.000     | Upregulates, (3)   |
| P04792 | HSPB1            | Activated                                   | ↑1.000     | Upregulates, (1)   |
| P08294 | SOD3             | Activated                                   | ↑1.000     | Upregulates, (1)   |
| Q9NR12 | PDLIM7           | Activated                                   | ↑1.000     | Upregulates, (1)   |
| P35442 | THBS2            | Activated                                   | ↑1.000     | Upregulates, (1)   |
| P10909 | CLU              | Activated                                   | ↑1.000     | Upregulates, (9)   |
| P13611 | VCAN             | Activated                                   | ↑1.000     | Upregulates, (3)   |
| P04003 | CABPA            | Activated                                   | ↑1.000     | Upregulates, (1)   |
| P98160 | HSPG2            | Activated                                   | ↑1.000     | Upregulates, (3)   |
| Q05682 | CALD1            | Activated                                   | ↑1.000     | Upregulates, (2)   |
| P21980 | TGME2            | Activated                                   | ↑1.000     | Upregulates, (16)  |
| P98095 | FBLN2            | Activated                                   | ↑1.000     | Upregulates, (4)   |
| P13987 | CD59             | Activated                                   | ↑1.000     | Upregulates, (14)  |
| P00751 | CFB              | Activated                                   | ↑1.000     | Upregulates, (1)   |
| Q9Y6C2 | EMILIN1          | Activated                                   | ↑1.000     | Upregulates, (2)   |
| P12109 | COL6A1           | Activated                                   | ↑1.000     | Upregulates, (6)   |
| P68032 | ACTC1            | Activated                                   | ↑1.000     | Upregulates, (3)   |
| P30626 | SRI              | Activated                                   | ↑1.000     | Upregulates, (1)   |
| P08603 | CFH              | Activated                                   | ↑1.000     | Upregulates, (1)   |
| Q99715 | COL12A1          | Activated                                   | ↑1.000     | Upregulates, (1)   |
| P02751 | FN1              | Activated                                   | ↑1.000     | Upregulates, (139) |
| Q9UBX5 | FBLN5            | Activated                                   | ↑1.000     | Upregulates, (4)   |
| P01042 | KNG1             | Activated                                   | ↑1.000     | Upregulates, (1)   |
| P09493 | TPM1             | Activated                                   | ↑1.000     | Upregulates, (12)  |
| Q14767 | LTBP2            | Activated                                   | ↑1.000     | Upregulates, (2)   |
| P12111 | COL6A3           | Activated                                   | ↑1.000     | Upregulates, (4)   |
| P39060 | COL18A1          | Affected                                    | ↑1.000     | Regulates, (1)     |
| Q15063 | POSTN            | Activated                                   | ↑1.000     | Upregulates, (6)   |
| Q16270 | IGFBP7           | Activated                                   | ↑1.000     | Upregulates, (4)   |
| P02649 | APOE             | Activated                                   | ↑1.000     | Upregulates, (1)   |
| P21810 | BGN              | Activated                                   | ↑1.000     | Upregulates, (19)  |
| Q14766 | LTBP1            | Activated                                   | ↑1.000     | Upregulates, (2)   |
| R49411 | TUFM             | Activated                                   | ↓-1.000    | Downregulates, (1) |
| P05107 | ITGB2            | Inhibited                                   | ↓-1.000    | Upregulates, (4)   |
| P23368 | ME2              | Inhibited                                   | ↓-1.000    | Upregulates, (1)   |
| P06744 | GPI              | Inhibited                                   | ↓-1.000    | Upregulates, (1)   |
| O15144 | ARPC2            | Inhibited                                   | ↓-1.000    | Upregulates, (1)   |
| P30740 | SERPINB1         | Inhibited                                   | ↓-1.000    | Upregulates, (1)   |
| Q9Y323 | SAMHD1           | Activated                                   | ↓-1.000    | Downregulates, (1) |
| P40227 | CCT6A            | Affected                                    | ↓-1.000    | Regulates, (2)     |
| P04899 | GNAI2            | Activated                                   | ↓-1.000    | Downregulates, (1) |
| P22897 | MRC1             | Inhibited                                   | ↓-1.000    | Upregulates, (1)   |
| P00491 | PNP              | Affected                                    | ↓-1.000    | Regulates, (2)     |
| P62191 | PSMC1            | Inhibited                                   | ↓-1.000    | Upregulates, (1)   |
| P29350 | PTPN6            | Inhibited                                   | ↓-1.000    | Upregulates, (1)   |
| P07900 | HSP90AA1         | Inhibited                                   | ↓-1.000    | Upregulates, (1)   |
| R48643 | CCT5             | Inhibited                                   | ↓-1.000    | Upregulates, (3)   |
| P31949 | S100A11          | Inhibited                                   | ↓-1.000    | Upregulates, (2)   |
| Q9NRV9 | HEBP1            | Affected                                    | ↓-1.000    | Regulates, (1)     |
| P02730 | SLC4A1           | Inhibited                                   | ↓-1.000    | Upregulates, (1)   |
| R48506 | SCLC             | Activated                                   | ↓-1.000    | Downregulates, (8) |
| P63244 | RACK1            | Inhibited                                   | ↓-1.000    | Upregulates, (5)   |
| P09601 | HMOX1            | Inhibited                                   | ↓-1.000    | Upregulates, (19)  |
| P43490 | NAMPT            | Affected                                    | ↓-1.000    | Regulates, (1)     |
| P08575 | PTPRC            | Affected                                    | ↓-1.000    | Regulates, (1)     |
| P63000 | RAC1             | Inhibited                                   | ↓-1.000    | Upregulates, (1)   |
| Q09666 | AHNAK            | Inhibited                                   | ↓-1.000    | Upregulates, (3)   |

## Supplementary Table S5.

### Primary antibodies used in this study

| Antibody          | Reactivity | Dilution | Supplier        | Reference   | Used in |
|-------------------|------------|----------|-----------------|-------------|---------|
| CD31-FITC         | H          | 1:25     | Biolegend       | 303103      | FC      |
| CD34-APC          | H          | 1:25     | Biolegend       | 343607      | FC      |
| CD45-PBlue        | H          | 1:25     | Biolegend       | 368539      | FC      |
| CD90-PE           | H          | 1:25     | Biolegend       | 328109      | FC      |
| CD73-FITC         | H          | 1:25     | Biolegend       | 344015      | FC      |
| CD105-FITC        | H          | 1:25     | Biolegend       | 323203      | FC      |
| CD309-PE          | H          | 1:25     | Biolegend       | 359903      | FC      |
| CD133-PE          | H          | 1:25     | Miltenyi Biotec | 130-098-826 | FC      |
| CD146-PE          | H          | 1:25     | Biolegend       | 361005      | FC      |
| CD14-FITC         | H          | 1:25     | Biolegend       | 367115      | FC      |
| Rabbit-anti-THBS1 | H, R, M    | 1:500    | Proteintech     | 18304-1-AP  | WB      |
| Goat-anti-Apo-E   | H          | 1:3000   | Sigma-Aldrich   | SAB2500086  | WB      |

### Secondary antibodies used in this study

| Antibody            | Reactivity | Dilution | Supplier      | Reference | Used in |
|---------------------|------------|----------|---------------|-----------|---------|
| HRP anti-rabbit IgG | R          | 1:5000   | Novus         | NB7160    | WB      |
| HRP anti-goat IgG   | G          | 1:2000   | Thermo Fisher | 61-1620   | WB      |

**FC:** Flow cytometry; **WB:** Western Blot; **H:** Human; **R:** Rat; **M:** mouse; **G:** Goat

Additionally, for cell detection FITC-UEA-1 (1:300, Sigma L9006) and DiI-ac-LDL (Biomedical Technologies, BT-902, Stoughton, MA, USA) were used.
